# Supplementary material for: Functional crosstalk between the TIM22 complex and YME1 machinery maintains mitochondrial proteostasis and integrity
Source: Oxford University Press journal article supplement (doi:10.1242/jcs.260060), 2023-01-05
Supplement: jcs260060supp.pdf [file jcs260060supp.pdf]

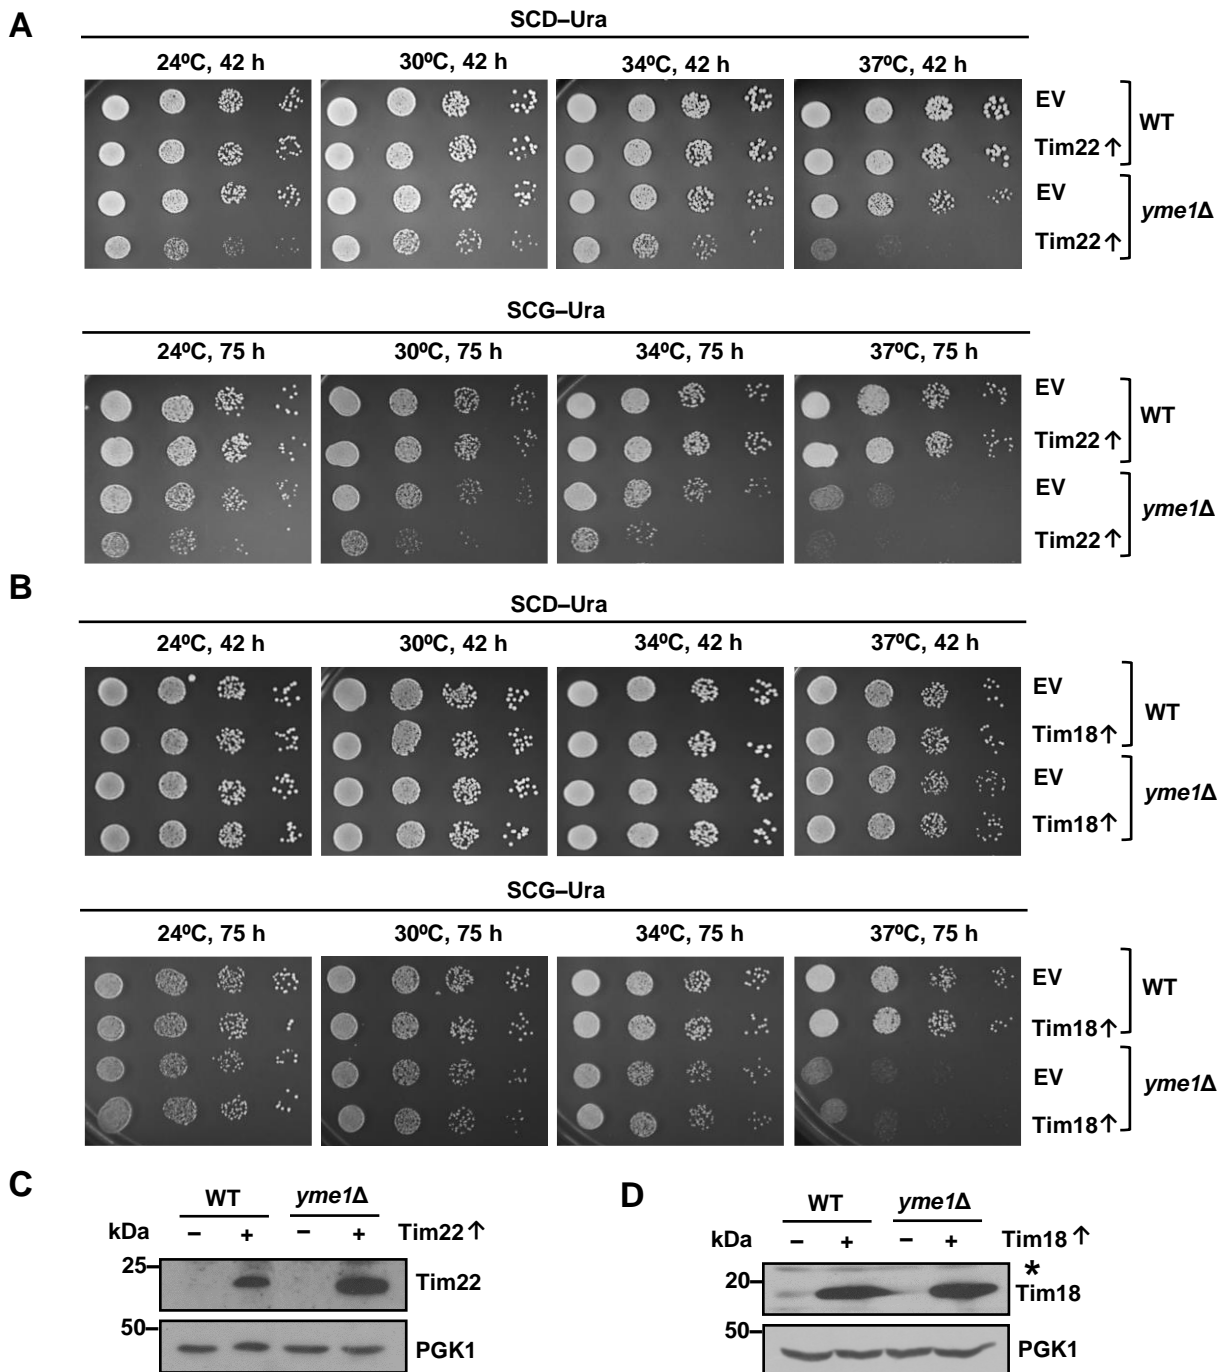

**Fig. S1. The overexpression of Tim22 aggravates the growth defects of the *yme1Δ* strain.** (A,B) Growth phenotype analysis upon overexpression. WT and *yme1Δ* strains overexpressing either Tim22 or Tim18 under the control of centromeric plasmid pRS416<sub>TEF</sub> were serially diluted and spotted on the indicated media. (C,D) Examination of steady-state levels of overexpressed proteins. The overexpression of Tim22 and Tim18 were examined by immunoblotting in the whole-cell extracts of the indicated strains. The asterisk indicates the presence of a non-specific band. Data in A–D are representative of *n*=3 experiments.

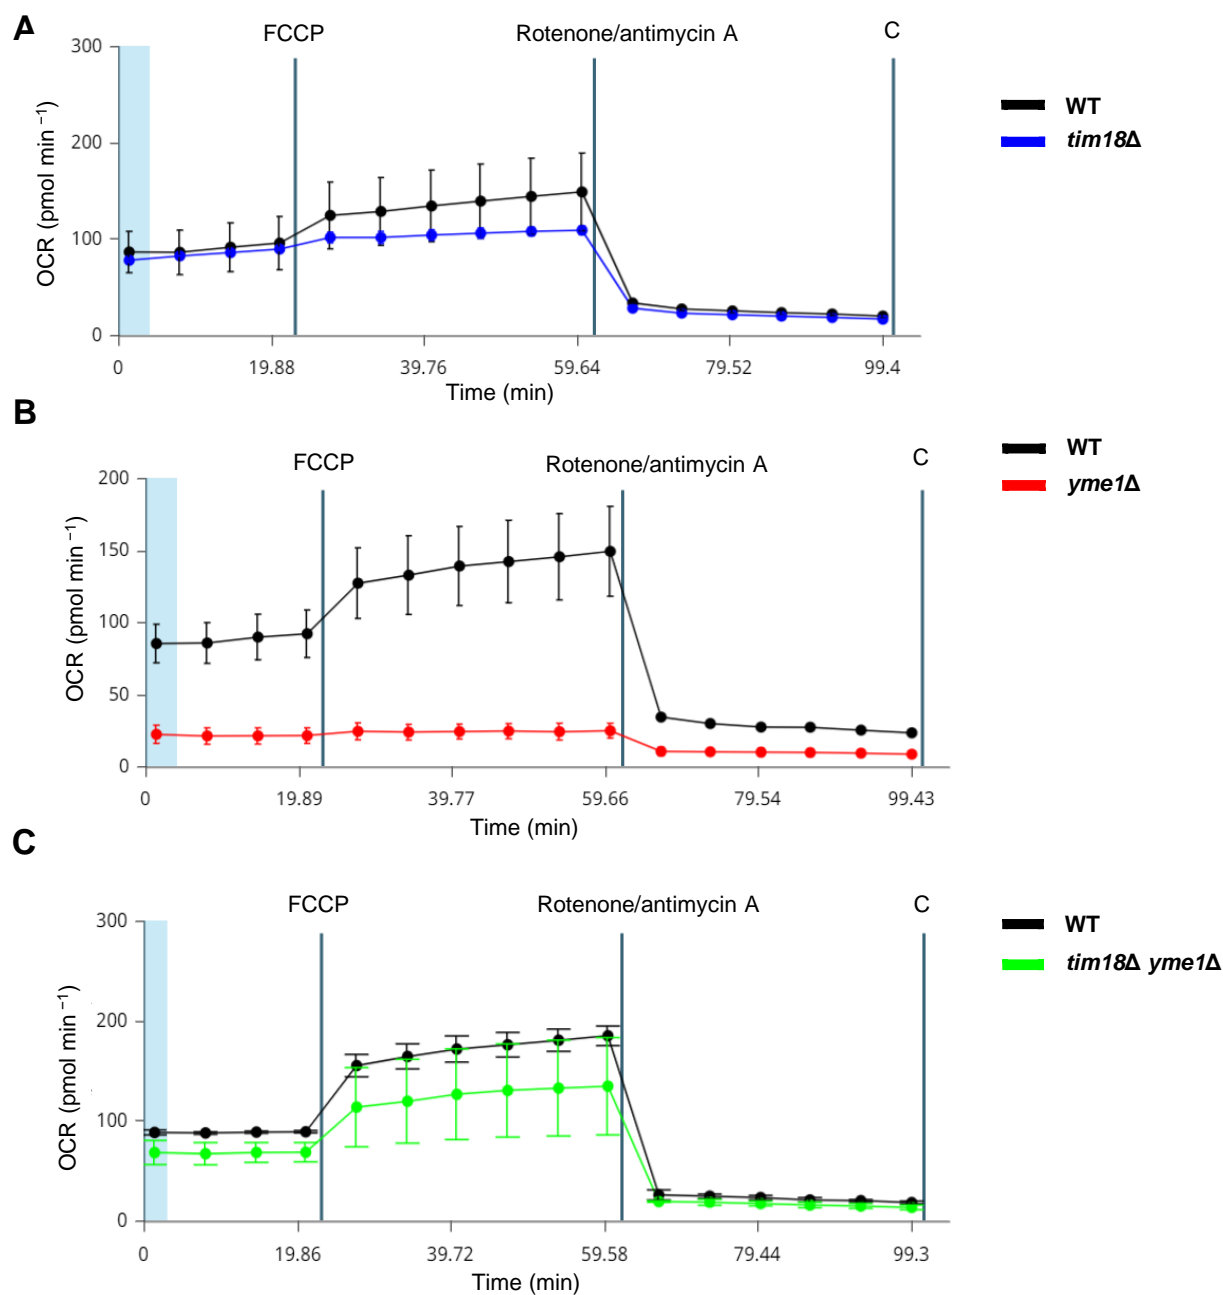

**Fig. S2. The deletion of Tim18 rescues the OCR of cells lacking Yme1.** (A-C) Measurement of OCRs. The respiratory capacity of WT and the indicated deletion strains were determined with a Seahorse XF HS mini analyzer. FCCP and rotenone/antimycin A were sequentially added to analyze mitochondrial respiratory efficiency. Each graph represents an individual experiment showing the pattern of OCRs for WT and the deletion strains.

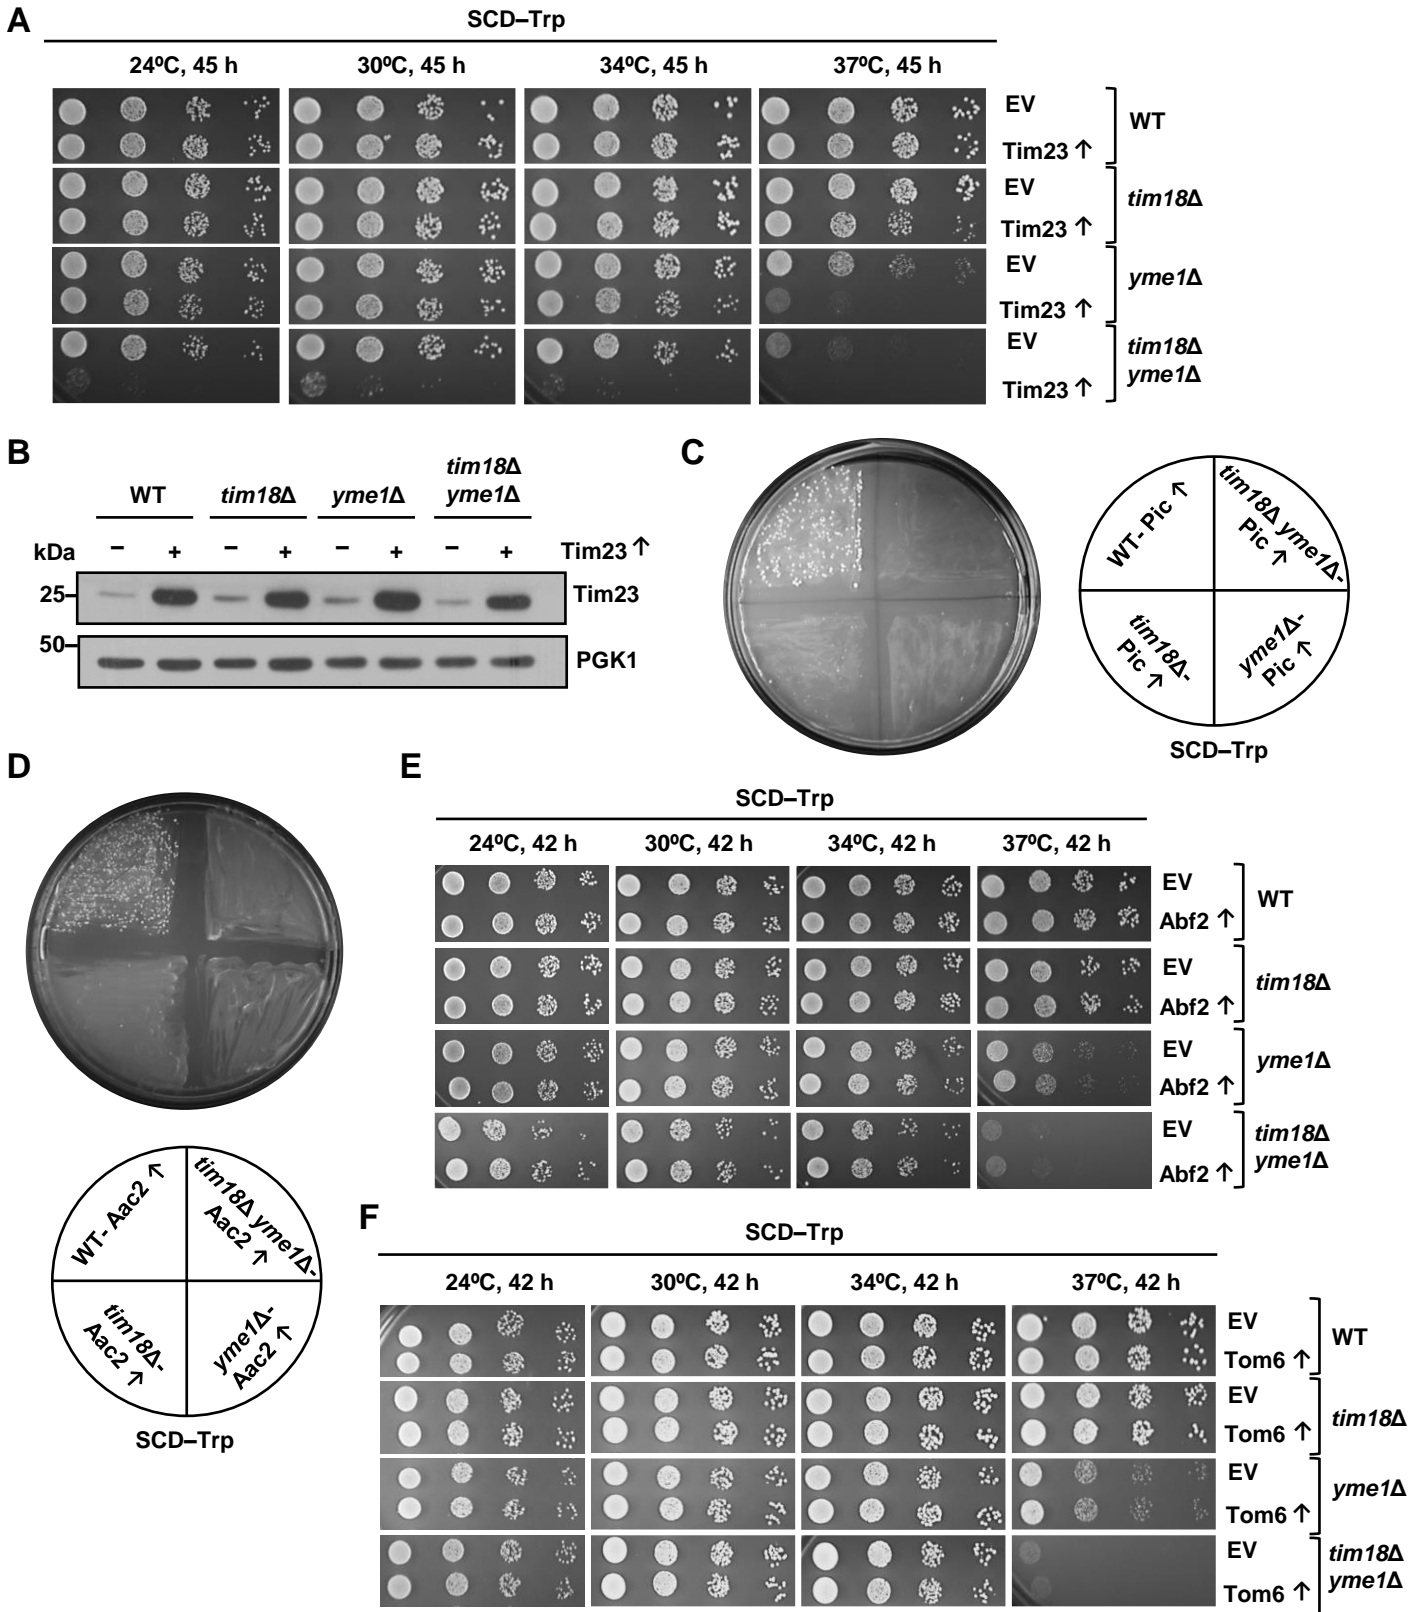

**Fig. S3. The overexpression of the TIM22 pathway substrates escalates the growth defects of the *yme1Δ* cells.** (A) Growth phenotype analysis upon overexpression of Tim23. Ten-fold serially diluted WT and deletion strains overexpressing Tim23 under the control of centromeric plasmid pRS414<sub>TEF</sub> were spotted on the SCD–Trp medium and incubated at different temperatures. (B) Estimation of the Tim23 overexpression. The overexpression of Tim23 was examined in the whole-cell extracts of the indicated strains by immunoblotting. (C,D) Assessment of Pic and Aac2 overexpression on the growth of WT and deletion strains. The ORFs of Pic and Aac2 were cloned in the pRS414<sub>TEF</sub> plasmid and transformed in WT and deletion strains, followed by plating on selection medium (SCD–Trp). (E,F) Examination of growth phenotype upon overexpression of Abf2 and Tom6. WT and deletion strains encompassing either EV, Abf2, or Tom6 overexpressing plasmids were grown to the mid-log phase, serially diluted, and spotted on the specified medium. The images shown are representative of *n*=3 biological replicates.

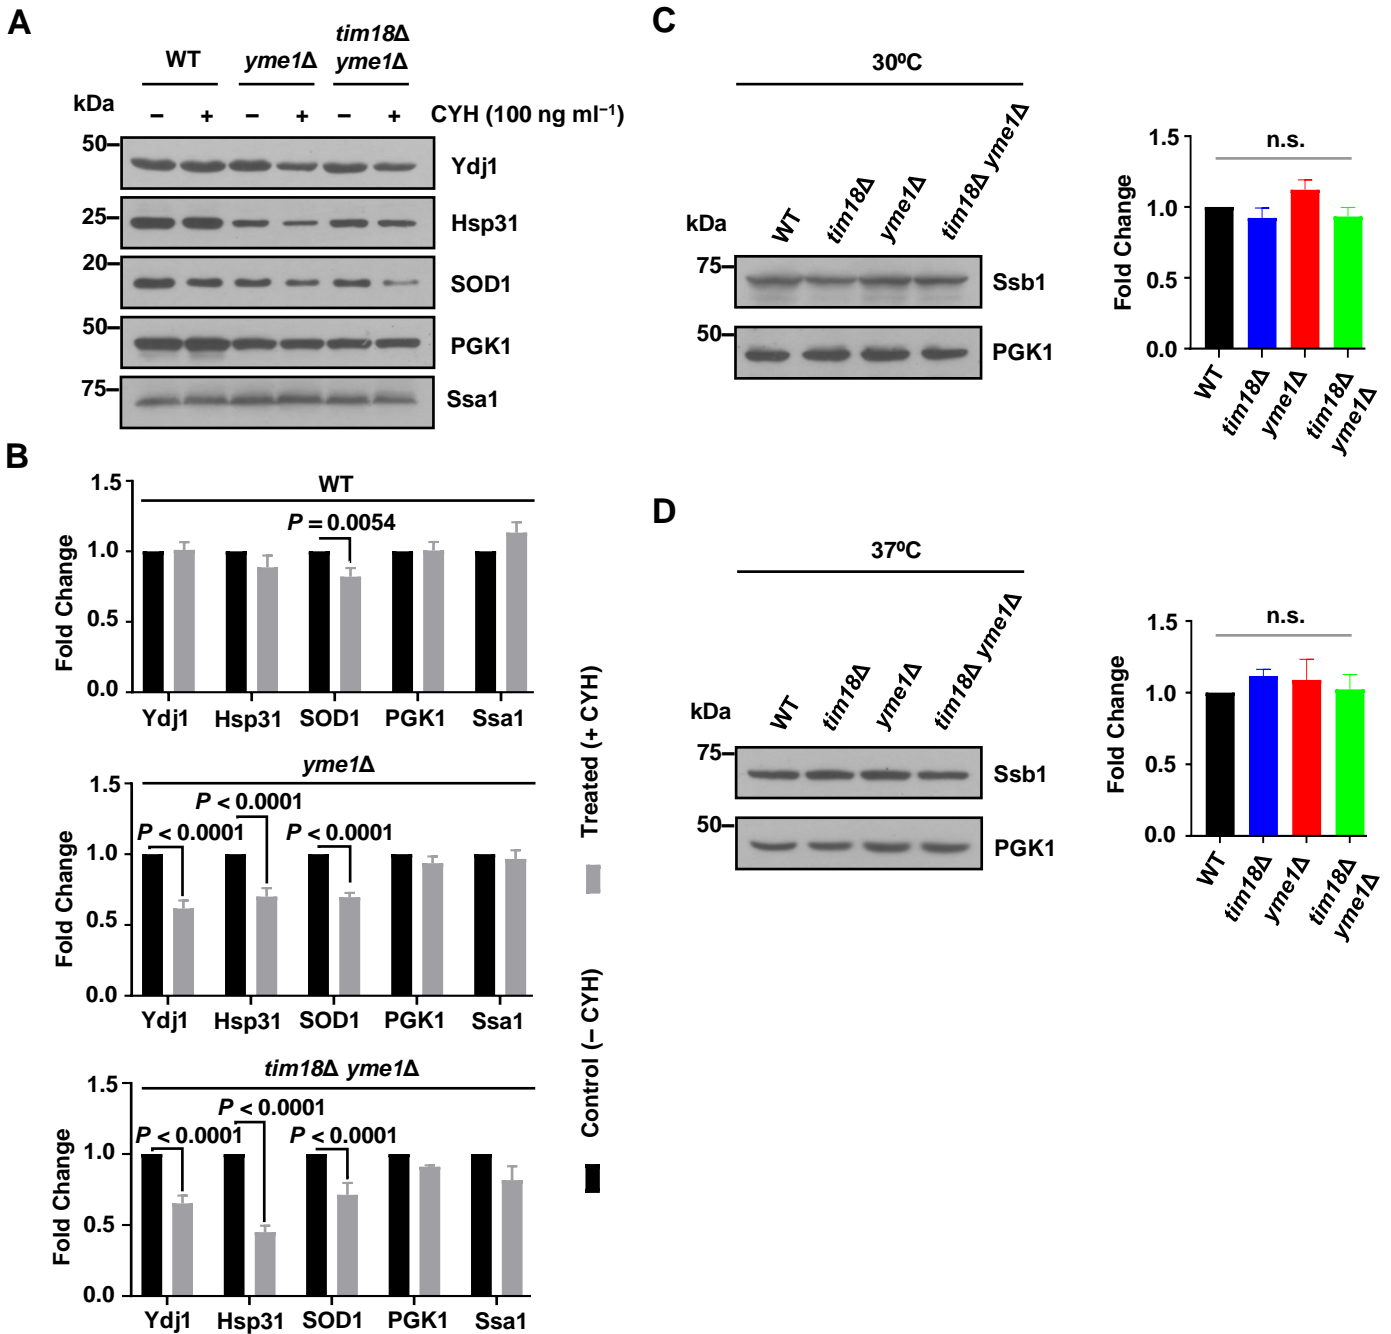

**Fig. S4. Partial suppression of cytosolic protein synthesis does not rescue the growth defects of *yme1Δ* cells.** (A,B) Assessment of the cytosolic protein inhibition upon CYH treatment. WT, *yme1Δ*, and *tim18Δ yme1Δ* strains were treated with CYH (100 ng ml<sup>-1</sup>) for 180 min, followed by immunoblot analysis of different cytosolic proteins in whole-cell extracts. (C,D) Estimation of Ssb1 steady-state protein levels. The expression of Ssb1 in the whole-cell extracts of WT and the indicated deletion strains was measured by immunoblotting at permissive and elevated temperatures. Data represent mean±s.e.m. of *n*=3 biological replicates. One-way ANOVA with Tukey's multiple comparisons test was used for determining statistical significance. n.s., not significant.

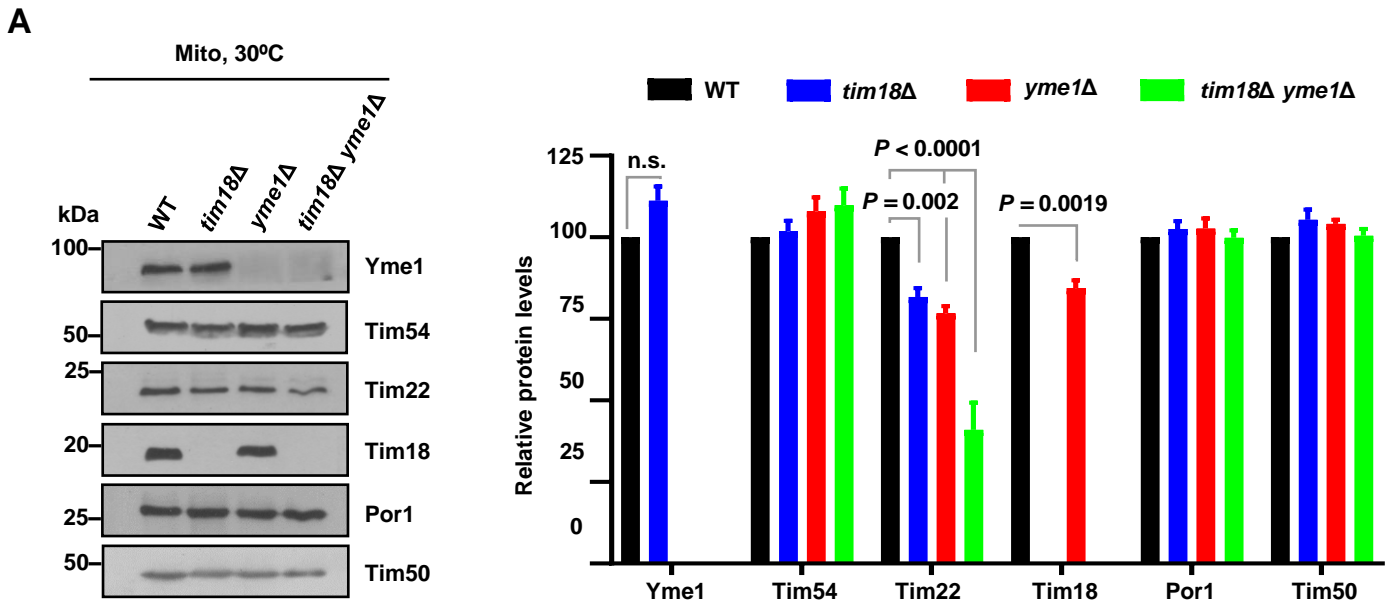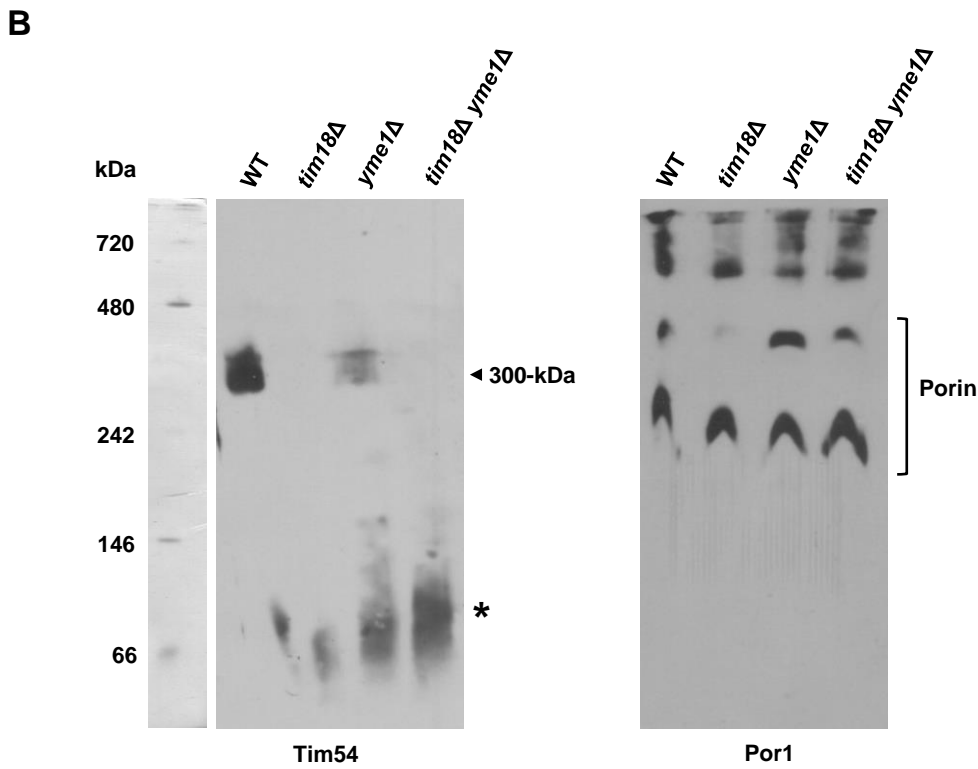

**Fig. S5. The loss of Yme1 affects the steady-state levels of the TIM22 complex components.** (A) Measurement of the protein levels of the carrier translocase machinery. 100  $\mu$ g of mitochondria isolated from indicated strains grown in YPG medium at 30°C were assessed by immunoblotting. Protein amounts were quantified using ImageJ software and were plotted as percentages by setting the intensities of WT mitochondria as 100%. Data specify mean $\pm$ s.e.m. of  $n=3$  biological replicates. Two-way ANOVA with Tukey's multiple-comparisons test was used for calculating statistical significance. n.s., not significant. (B) Analysis of the stability of the carrier translocase machinery using BN-PAGE. Mitochondria isolated from WT, *tim18* $\Delta$ , *yme1* $\Delta$ , and *tim18* $\Delta$  *yme1* $\Delta$  cells grown at 37°C in YPG for 24 h were solubilized in digitonin buffer, and proteins were examined by BN-PAGE followed by immunoblotting with the indicated antibodies. Arrowhead represents the TIM22 complex (~300-kDa), and the asterisk indicates possible intermediate subcomplexes. The data shown are representative of  $n=3$  biological replicates.

Fig. S6. Blot transparency

Fig. 1

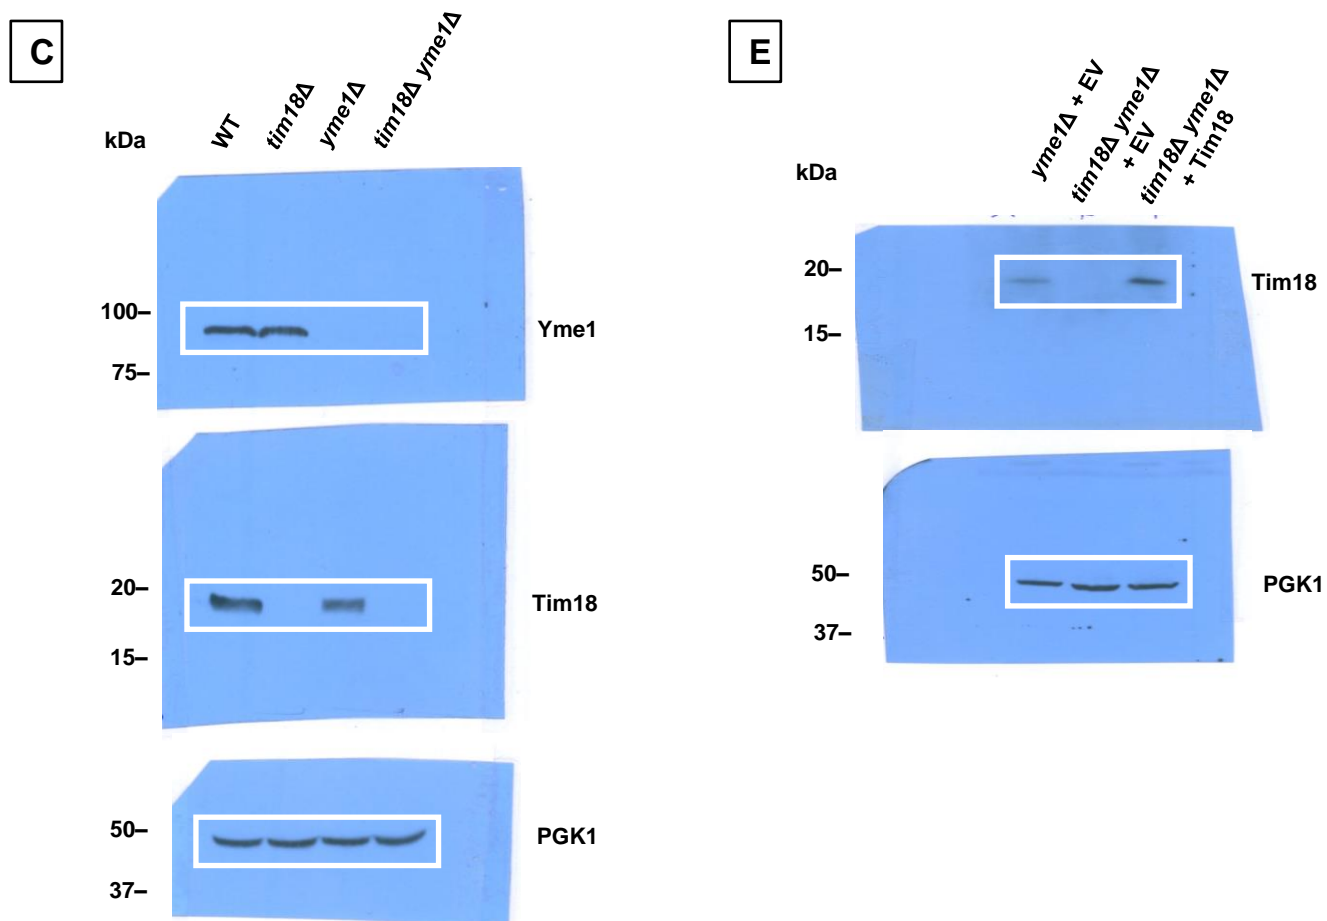



Fig. 3

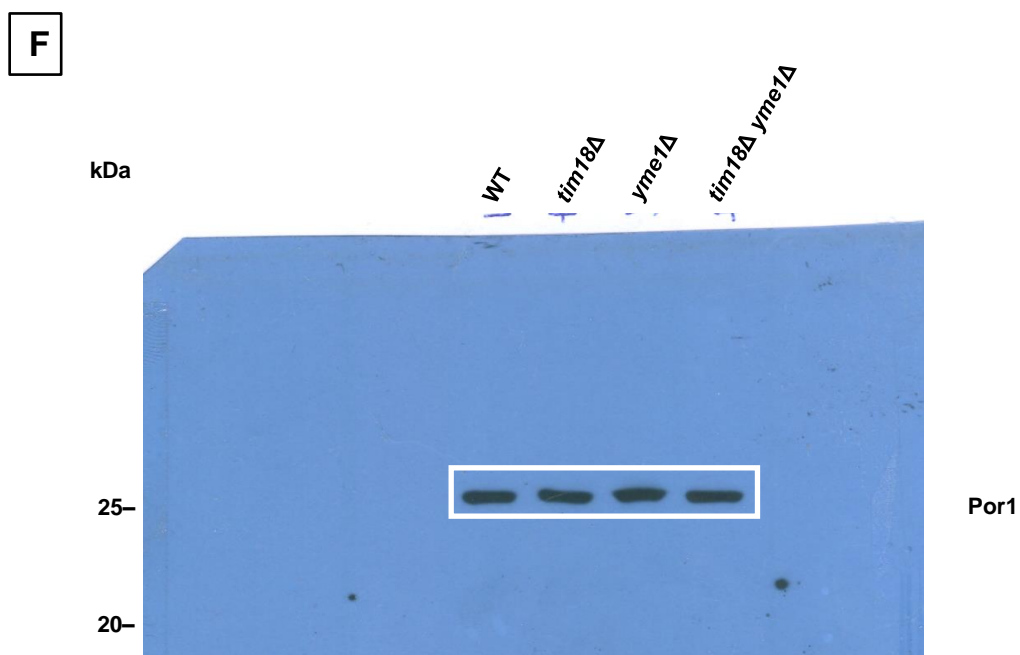

Fig. 4

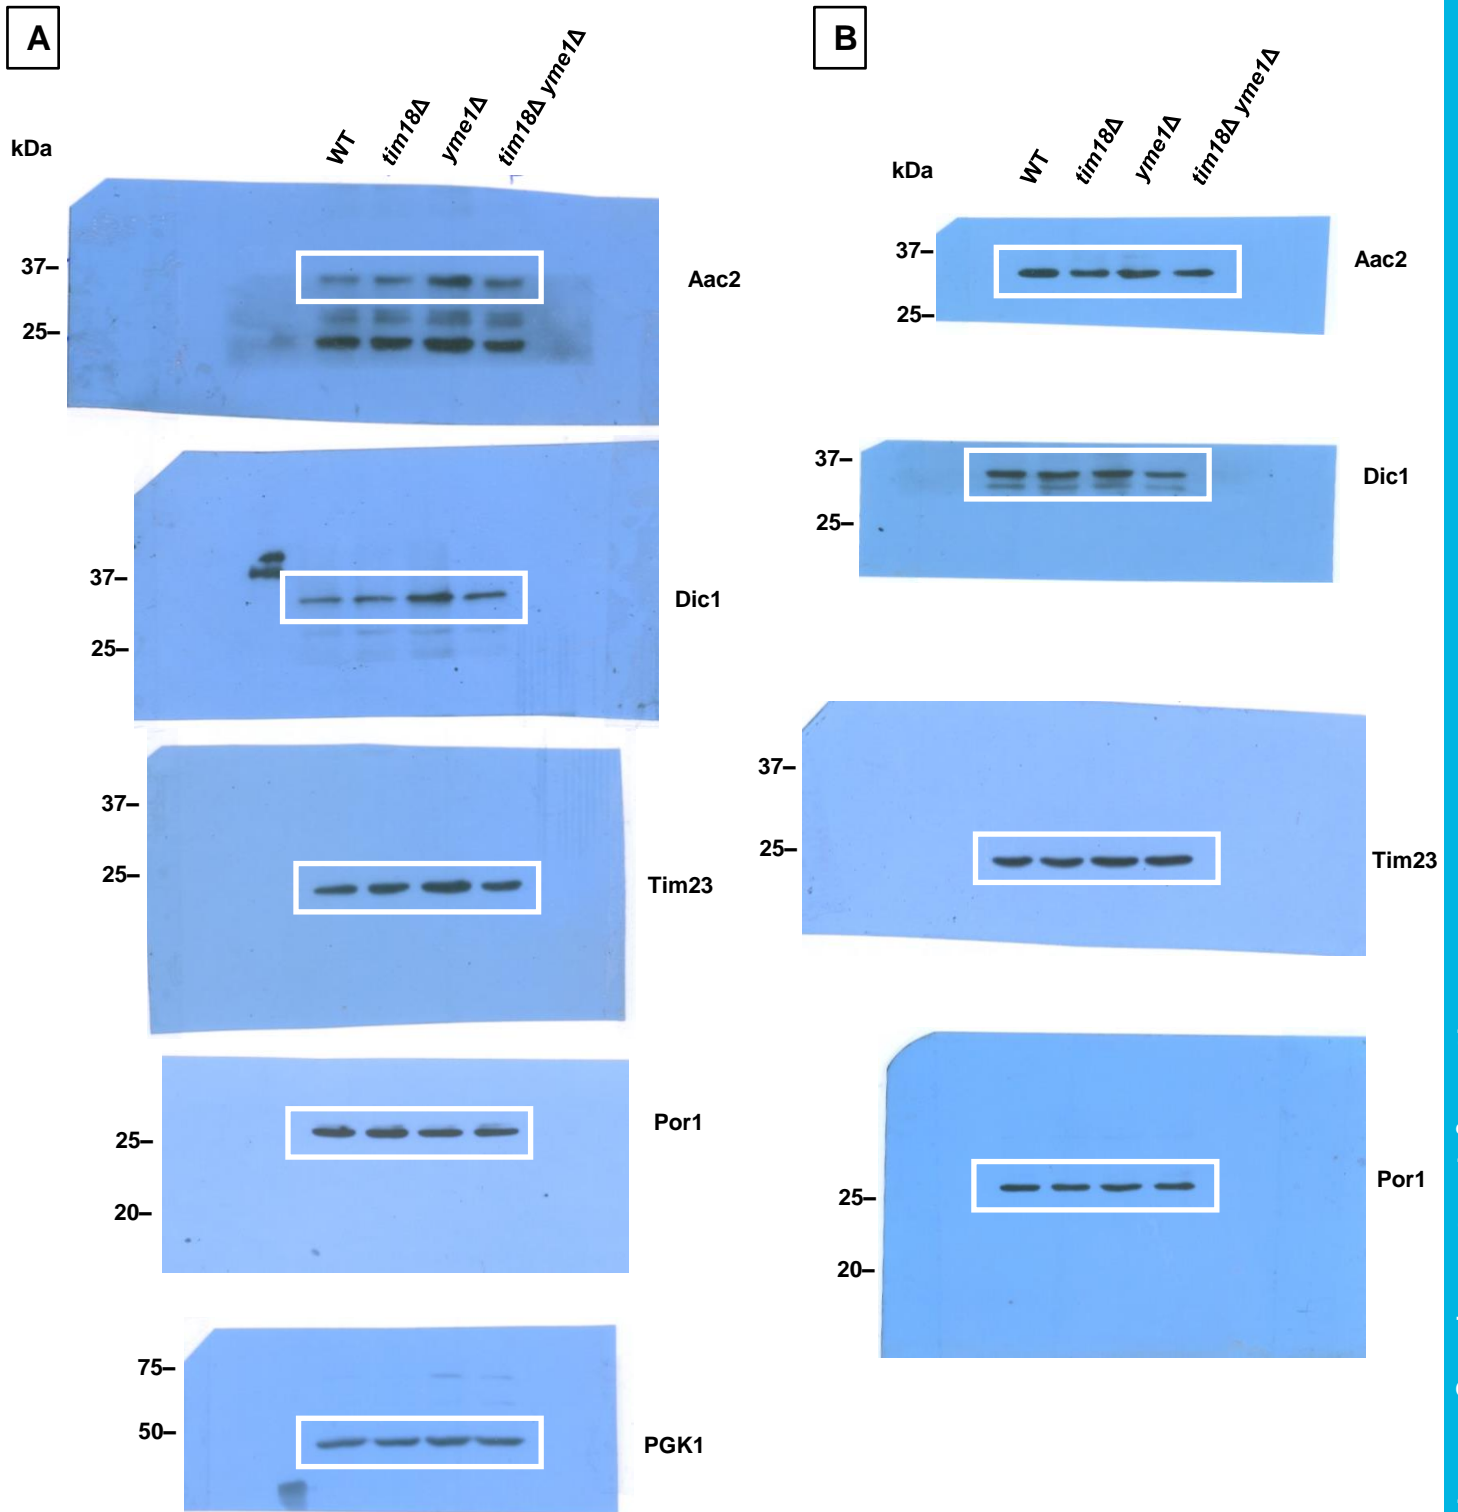

Fig. 5

B

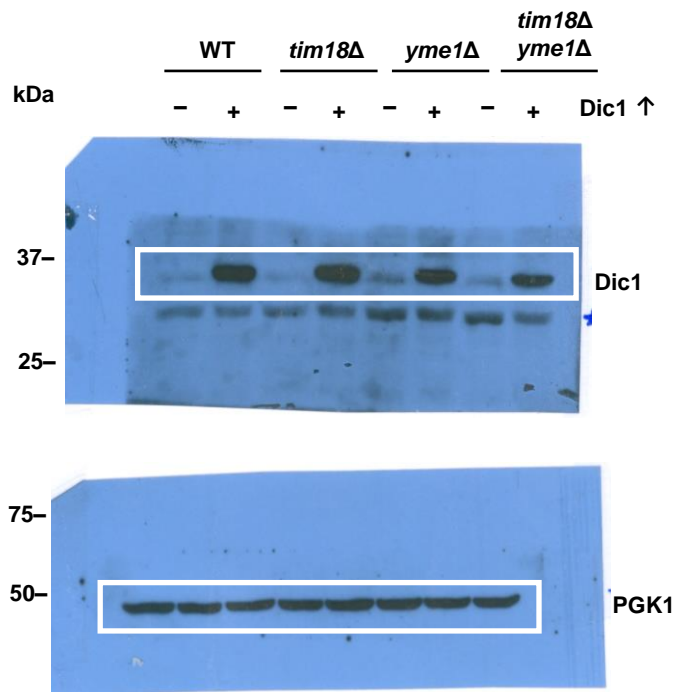

**Fig. 6**

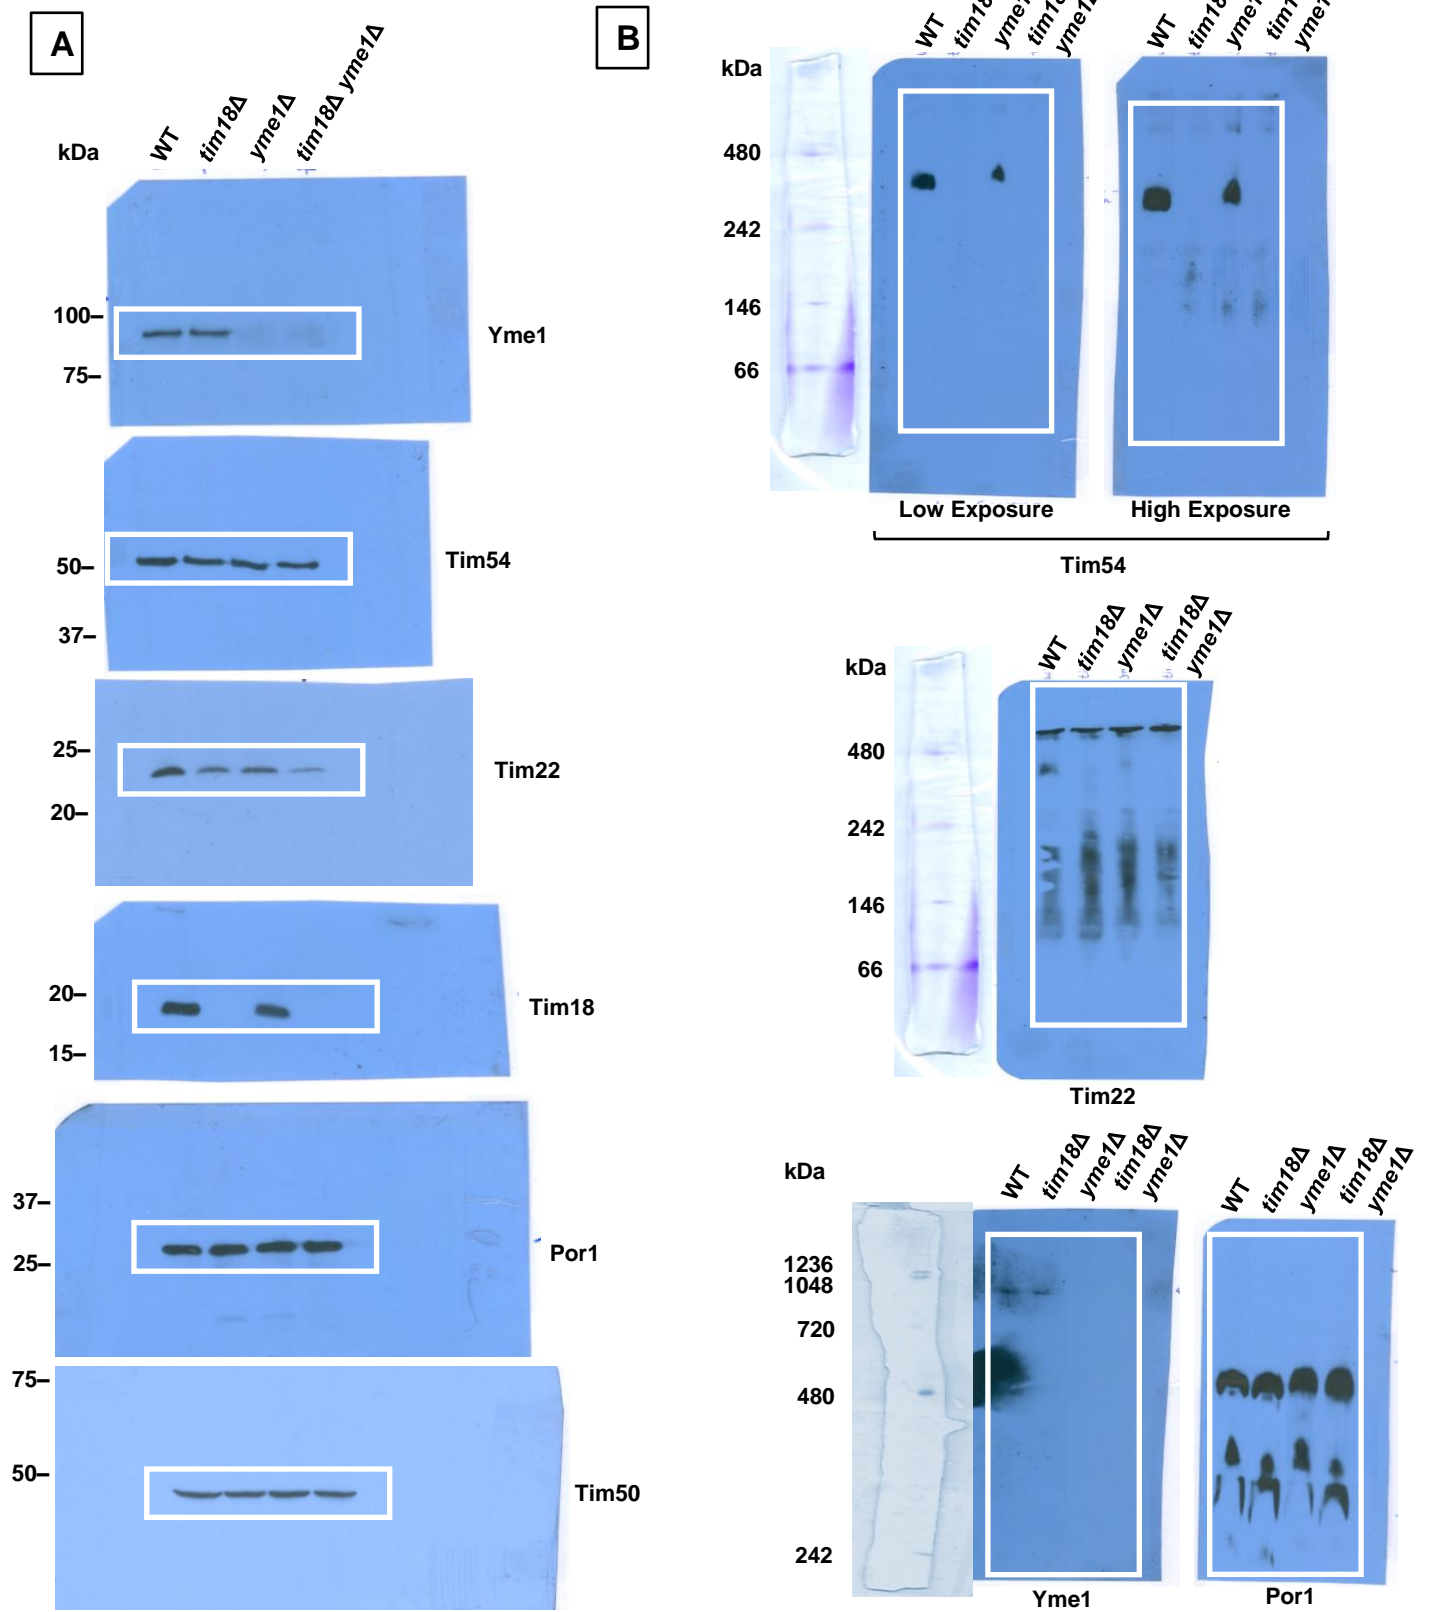

Fig. 6

C

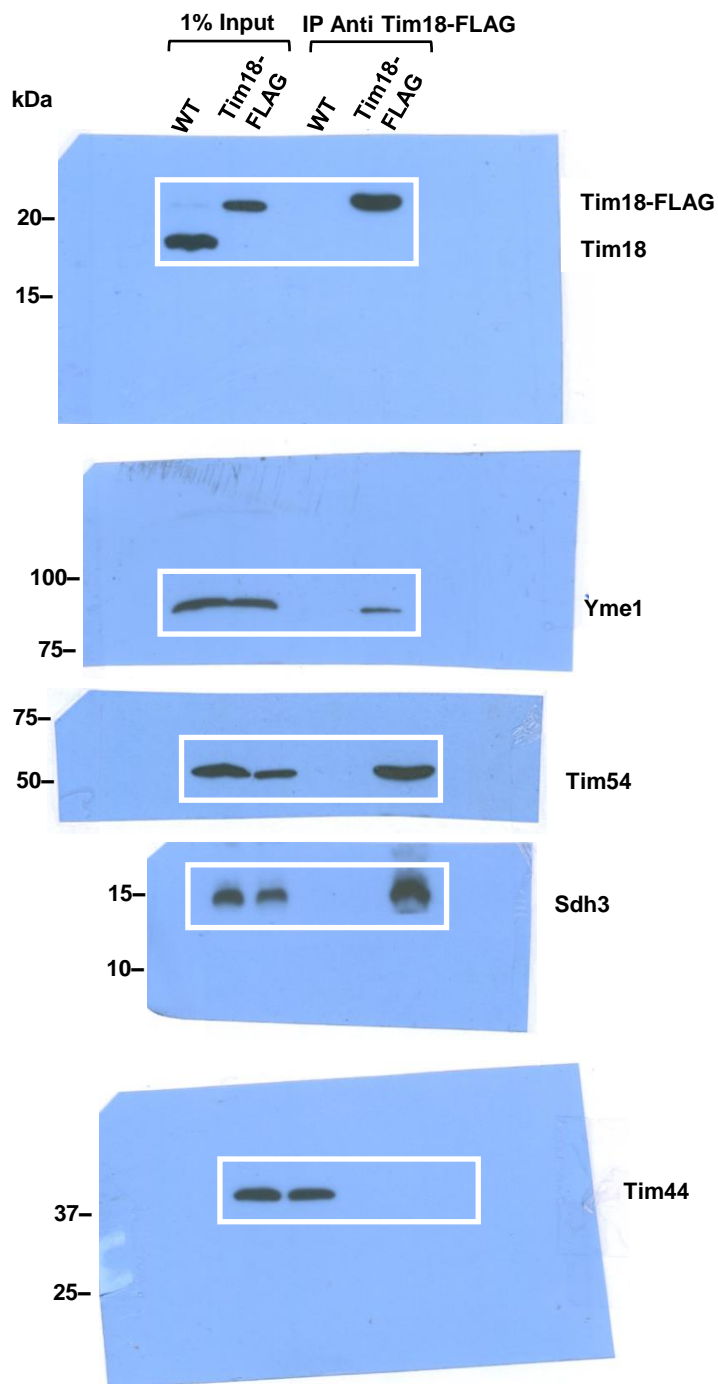

**Fig. 6**

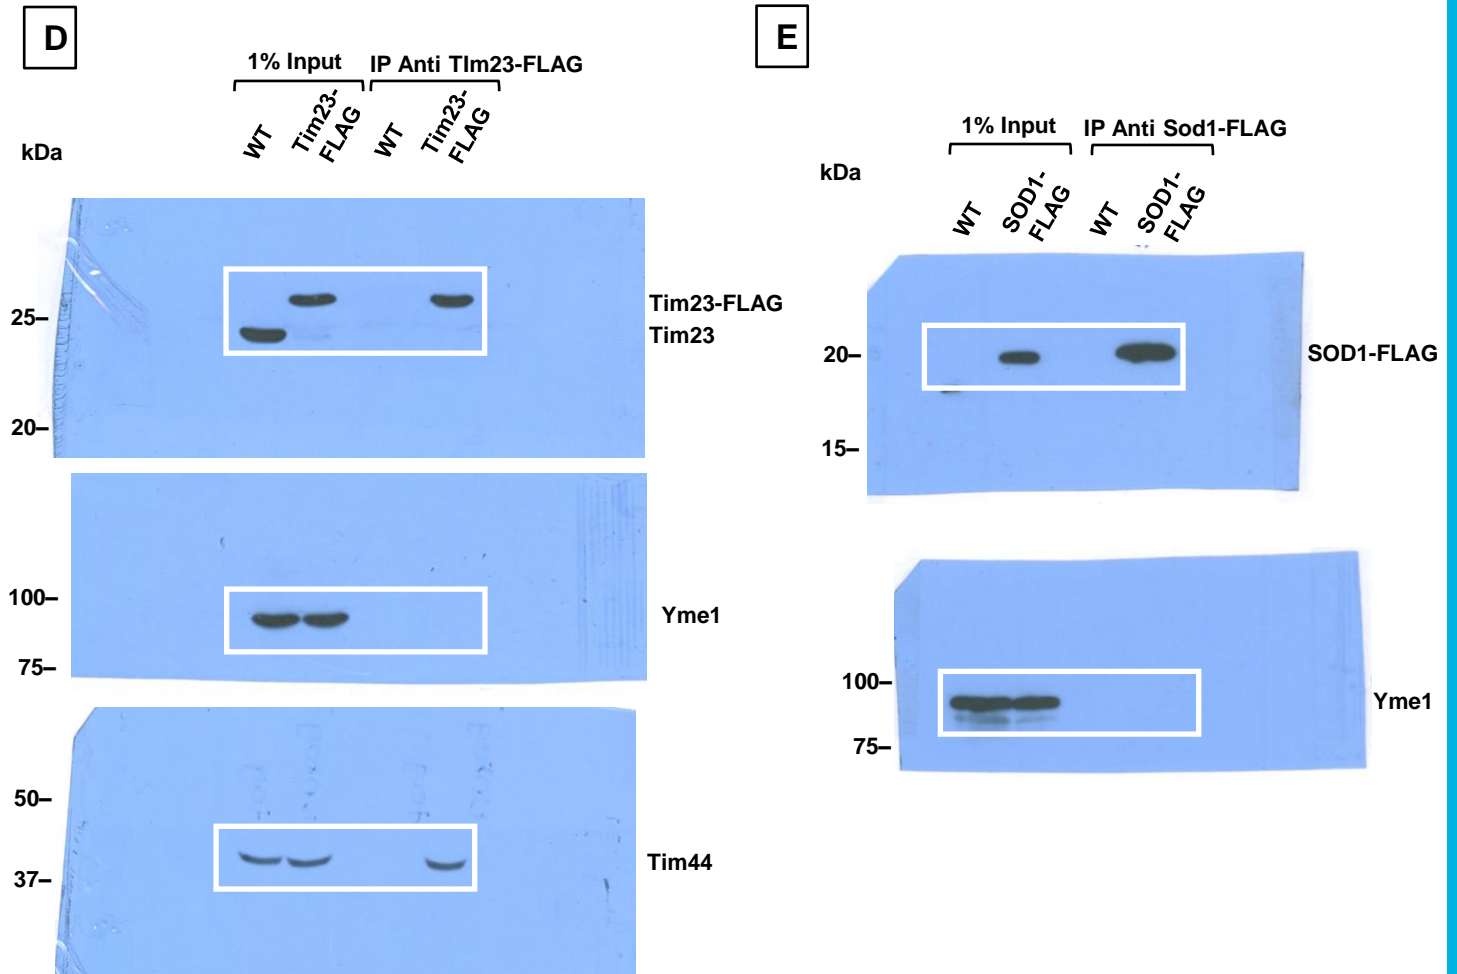

Fig. S1

C

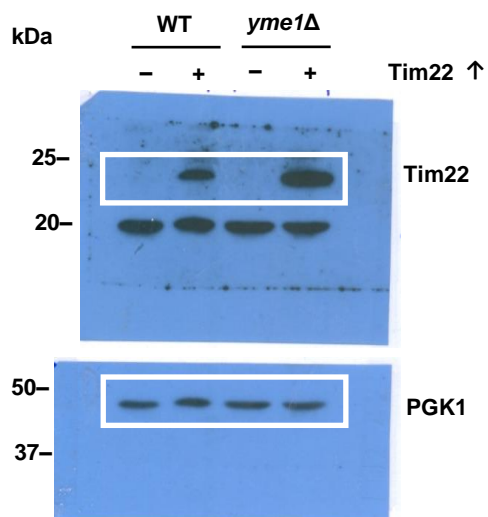

D

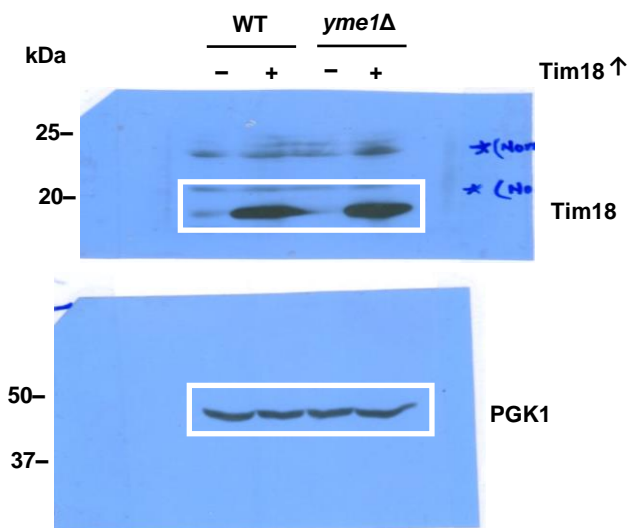

Fig. S3

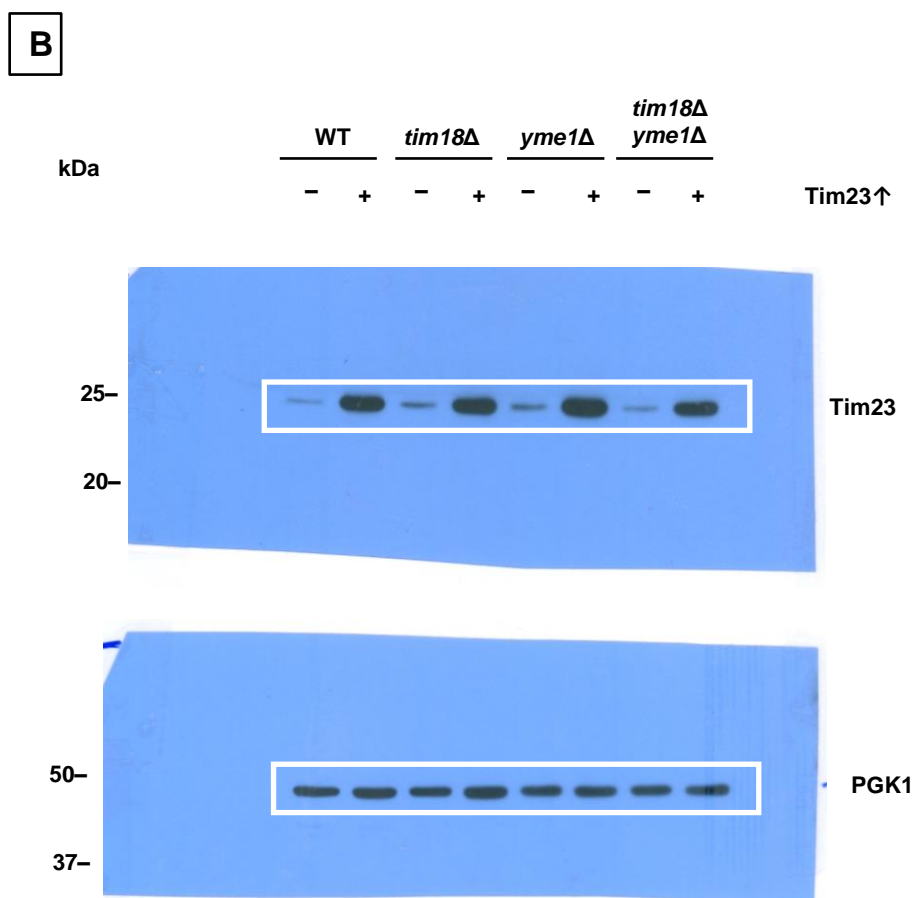



Fig. S4

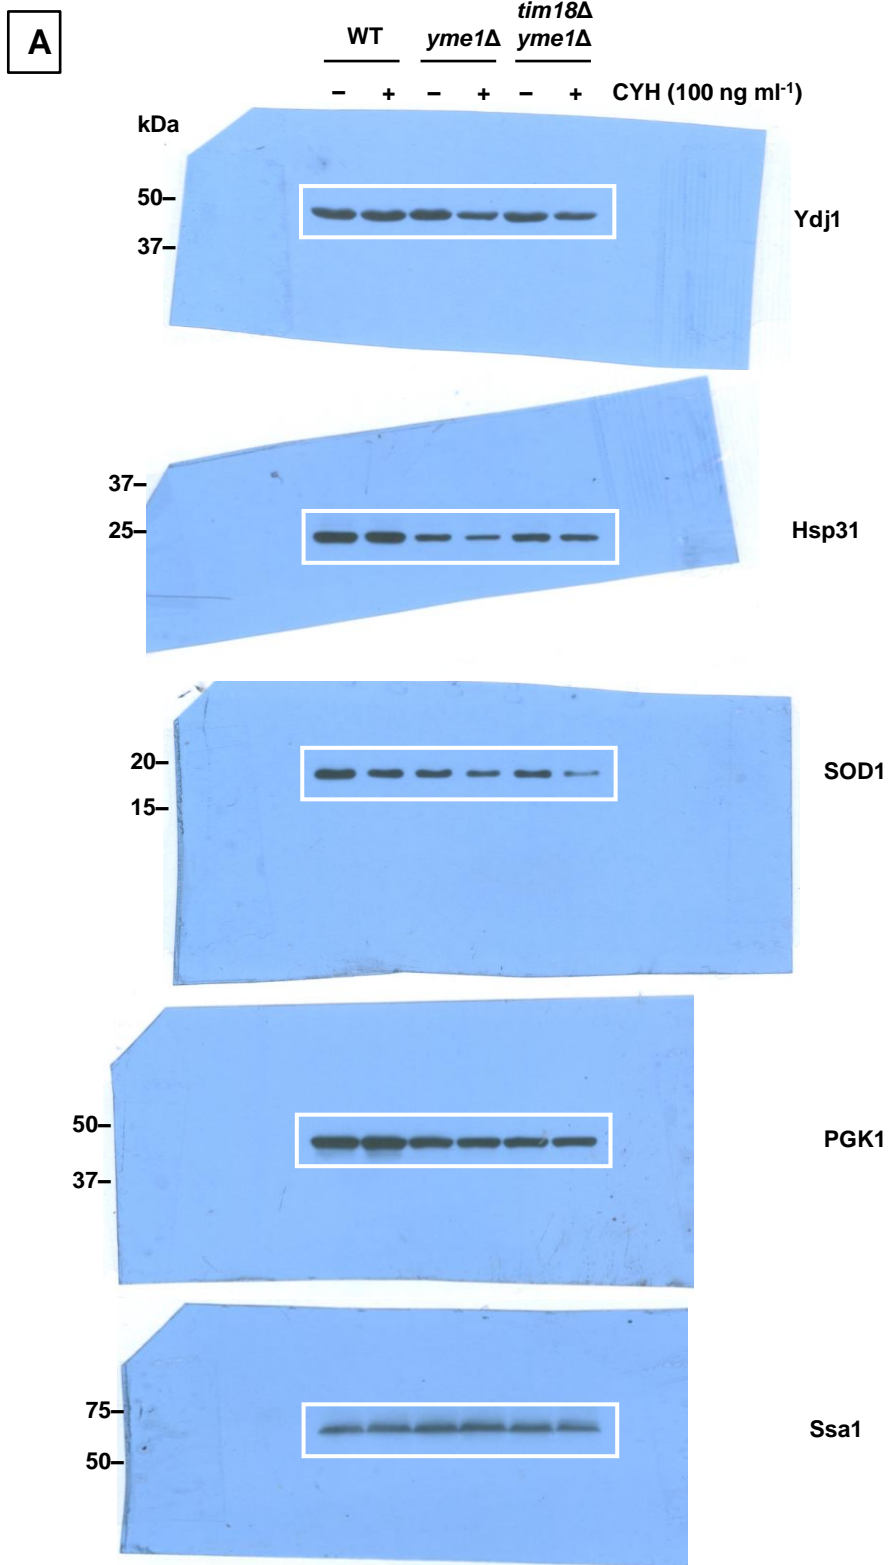

Fig. S4

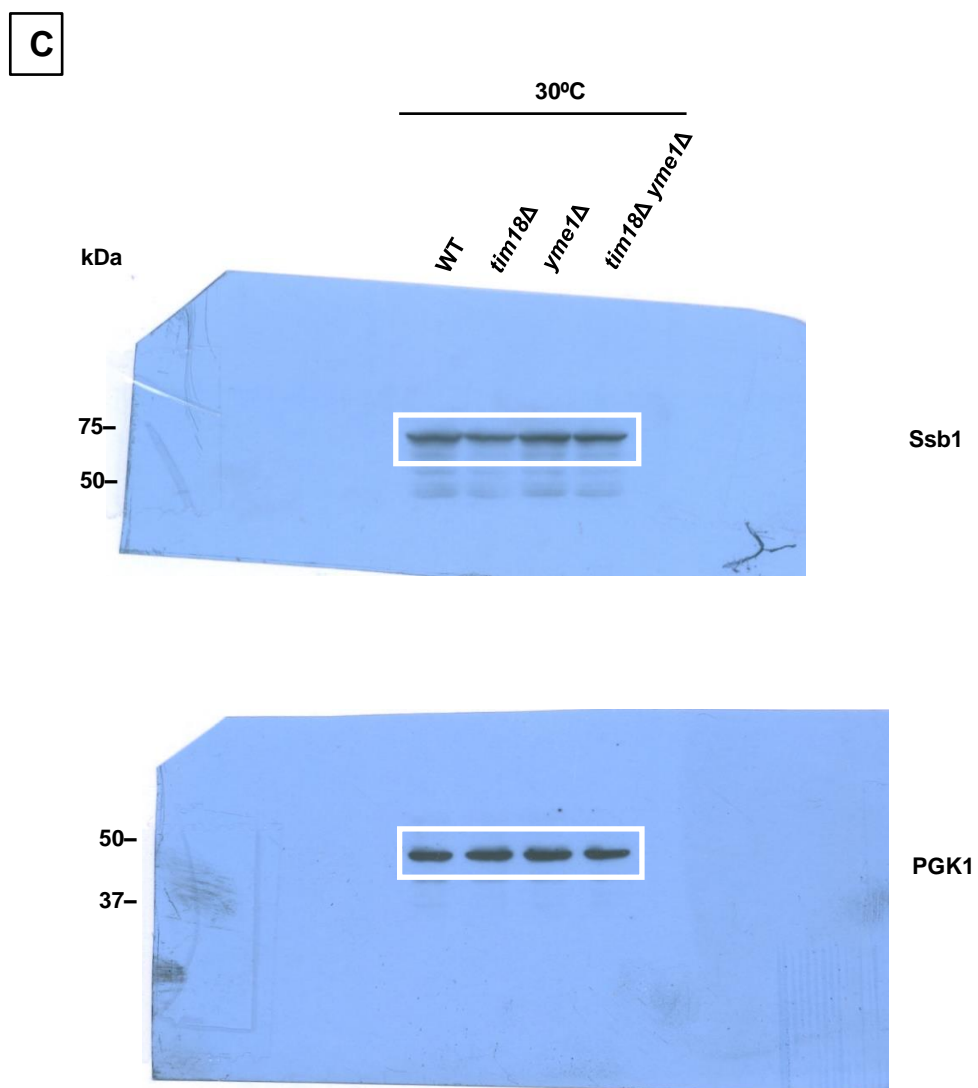

Fig. S4

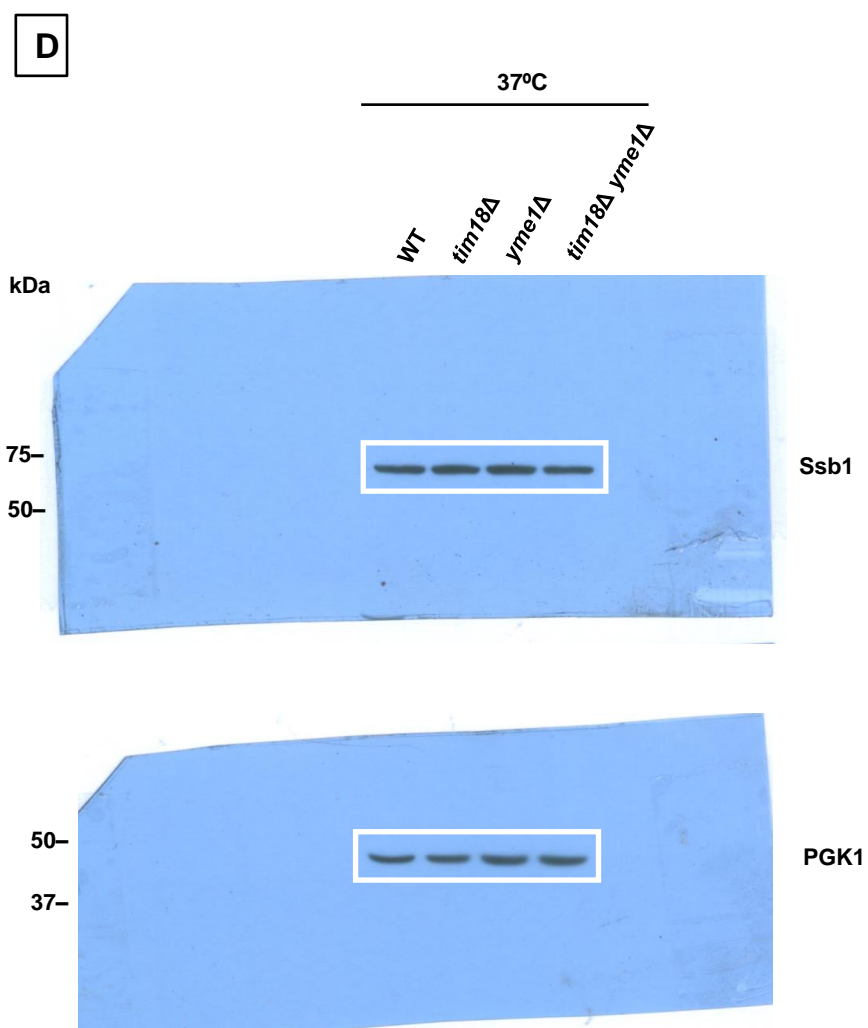

Fig. S5

**A**

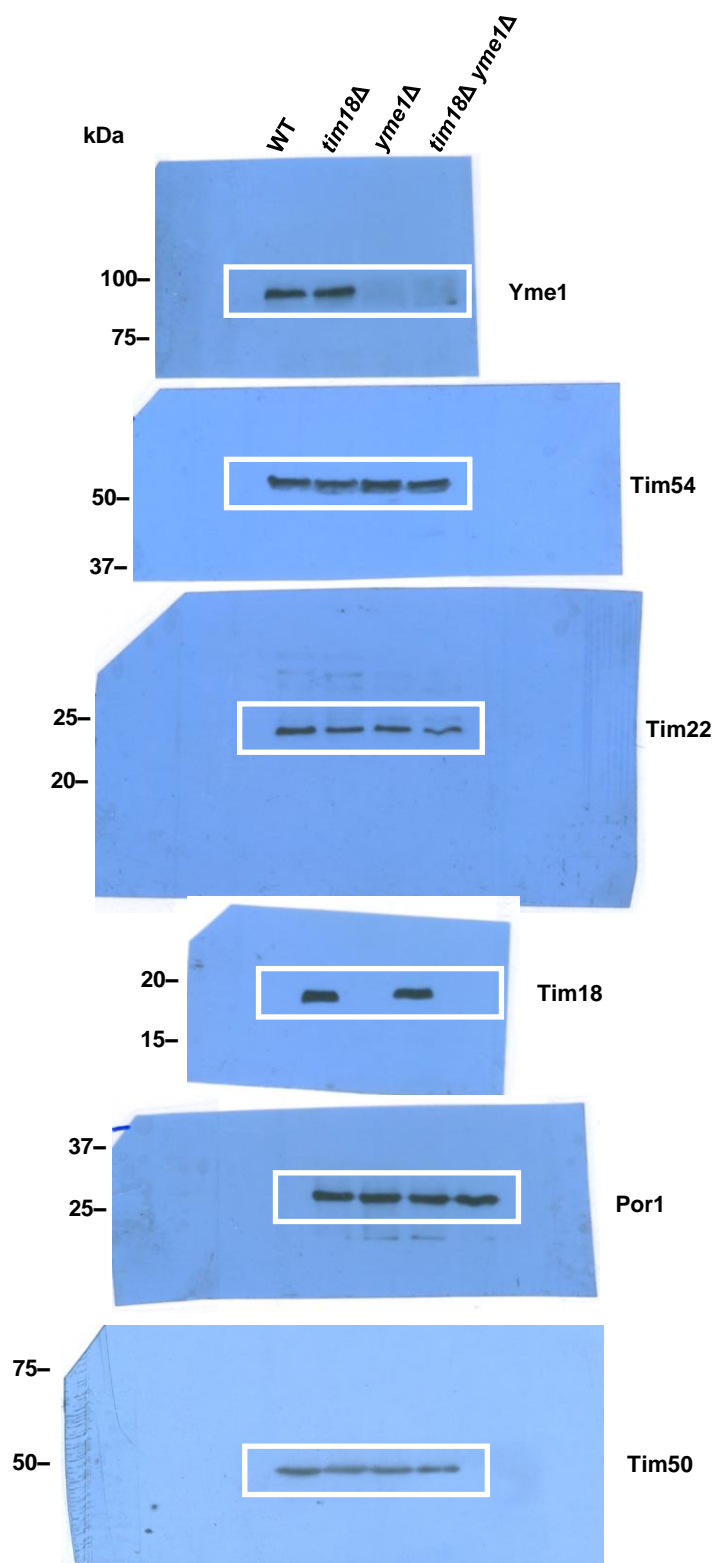

Fig. S5

**B**

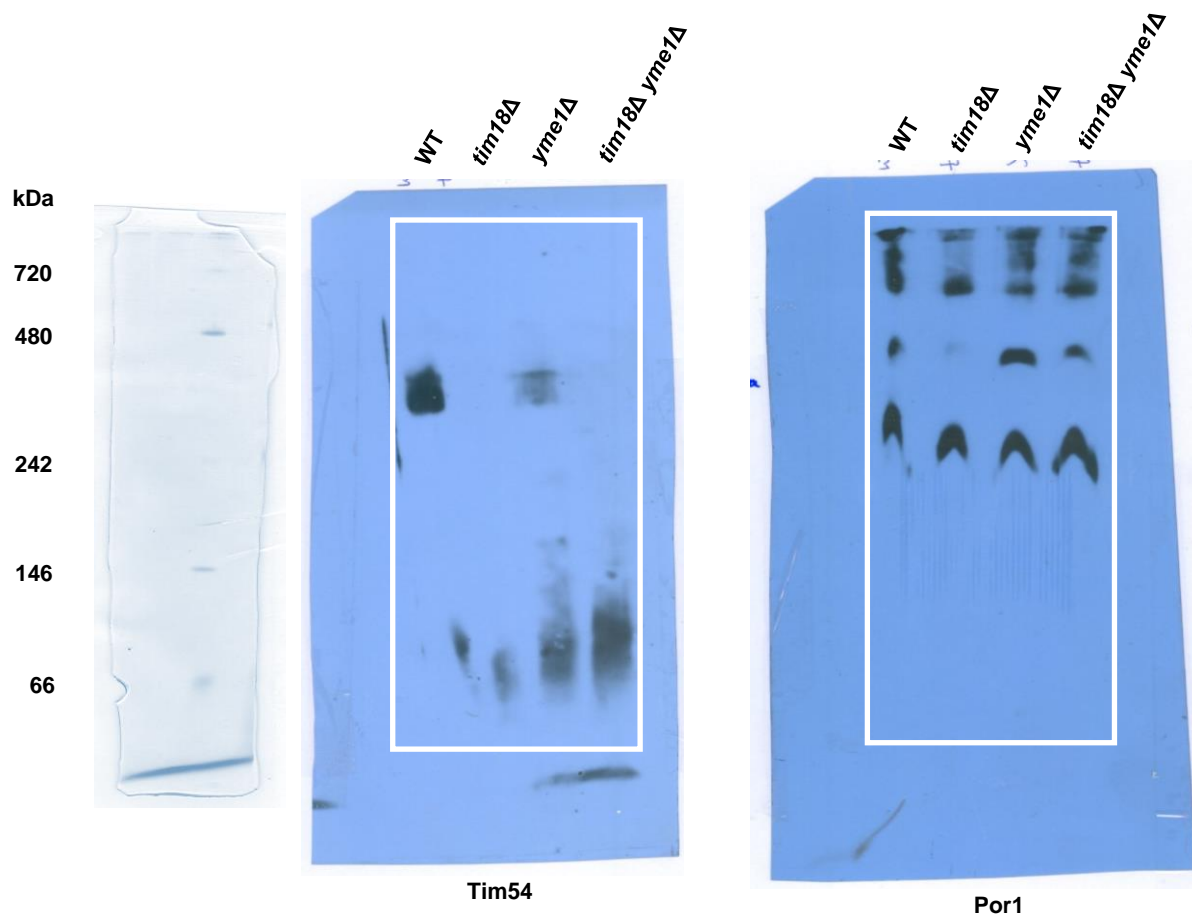

**Table S1. Yeast strains used in this study**

| Name                   | Genotype                                                                                                                                                                                                                               | Source                 |
|------------------------|----------------------------------------------------------------------------------------------------------------------------------------------------------------------------------------------------------------------------------------|------------------------|
| WT W303                | <i>MATa ade2-1 his3-11, 15 ura3-1 leu2-3, 112 trp1-1 can1-100 GAL2 met2-1 lys2-2</i>                                                                                                                                                   | Hines et al., 2011     |
| <i>tim18Δ</i>          | <i>MATa ade2-1 his3-11, 15 ura3-1 leu2-3, 112 trp1-1 can1-100 GAL2 met2-1 lys2-2 tim18Δ::KanMX4</i>                                                                                                                                    | This study             |
| <i>yme1Δ</i>           | <i>MATa ade2-1 his3-11, 15 ura3-1 leu2-3, 112 trp1-1 can1-100 GAL2 met2-1 lys2-2 yme1Δ::HphNT1</i>                                                                                                                                     | This study             |
| <i>tim18Δ yme1Δ</i>    | <i>MATa ade2-1 his3-11, 15 ura3-1 leu2-3, 112 trp1-1 can1-100 GAL2 met2-1 lys2-2 tim18Δ::KanMX4 yme1Δ::HphNT1</i>                                                                                                                      | This study             |
| K127A <i>yme1Δ</i>     | <i>MATa ade2-1 his3-11, 15 ura3-1 leu2-3, 112 trp1-1 can1-100 tim22Δ::CgHIS3 [pRS314-tim22<sub>K127A</sub>] yme1Δ::HphNT1</i>                                                                                                          | This study             |
| WT Tim22-316           | <i>MATa ade2-1 his3-11, 15 ura3-1 leu2-3, 112 trp1-1 can1-100 tim22 Δ::CgHIS3, [pRS316-Tim22 ]</i>                                                                                                                                     | Okamoto et al., 2014   |
| Tim18FLAG/WT Tim22-316 | <i>MATa ade2-1 his3-11, 15 ura3-1 leu2-3, 112 trp1-1 can1-100 tim22 Δ::CgHIS3, TIM18-FLAG::KanMX6 [pRS316-Tim22 ]</i>                                                                                                                  | Okamoto et al., 2014   |
| PTY44                  | <i>MATa Iys2 ura3-52 leu2-3,112 trp1-Δ1 [rho<sup>+</sup> TRP1]</i>                                                                                                                                                                     | Thorsness et al., 1993 |
| PTY44/ <i>tim18Δ</i>   | <i>MATa Iys2 ura3-52 leu2-3,112 trp1-Δ1 tim18Δ::KanMX4 [rho<sup>+</sup> TRP1]</i>                                                                                                                                                      | This study             |
| PTY52                  | <i>MATa Iys2 ura3-52 leu2-3,112 trp1-Δ1 yme1-Δ1::URA3 [rho<sup>+</sup> TRP1]</i>                                                                                                                                                       | Thorsness et al., 1993 |
| PTY52/ <i>tim18Δ</i>   | <i>MATa Iys2 ura3-52 leu2-3,112 trp1-Δ1 yme1-Δ1::URA3 tim18Δ::KanMX4 [rho<sup>+</sup> TRP1]</i>                                                                                                                                        | This study             |
| PJ53/Tim23-FLAG        | <i>trp1-1/trp1-1, ura3-1/ura3-1, leu2-3,112/leu2-3/112, his3-11,15/his3-11,15 ade2-1/ade2-1, can1-100/can1-100 GAL2<sup>+</sup>/GAL2<sup>+</sup>, met2-Δ1/met2-Δ1, lys2-Δ2/lys2-Δ2, TIM23-FLAG::KanMX4</i>                             | This study             |
| PJ53/SOD1-FLAG         | <i>trp1-1/trp1-1, ura3-1/ura3-1, leu2-3,112/leu2-3/112, his3-11,15/his3-11,15 ade2-1/ade2-1, can1-100/can1-100 GAL2<sup>+</sup>/GAL2<sup>+</sup>, met2-Δ1/met2-Δ1, lys2-Δ2/lys2-Δ2, sod1Δ::HphNT1 [pRS416<sub>GPD</sub>-SOD1-FLAG]</i> | This study             |

**Table S2. Plasmid constructs and primers used in this study**

| <b>Primers used for deletion of <i>TIM18</i> and <i>YME1</i> gene</b> |                                                                             |               |
|-----------------------------------------------------------------------|-----------------------------------------------------------------------------|---------------|
| <b>Construct Name</b>                                                 | <b>Orientation (5'-3')</b>                                                  | <b>Source</b> |
| <i>tim18Δ</i> Fwd                                                     | CGGTGATGCGAGGTGCAACAACCTGAGTAATTTAATACCT<br>TTGGCGTACGCTGCAGGTCGAC          | This study    |
| <i>tim18Δ</i> Rev                                                     | GAAATCTTAGAAATGCAAAAAAAAAAAGAAAAAGTATGGG<br>TGAGTCAATCGATGAATTCGAGCTCG      | This study    |
| <i>yme1Δ</i> Fwd                                                      | GCAATTTTAAATTATAATACATTGTGGATAGAACGAAAAC<br>AGAGACGTGCGTACGCTGCAGGTCGAC     | This study    |
| <i>yme1Δ</i> Fwd                                                      | CGGTCTTGAGGTAGGTTTCCTTCATACGTTTAACTTCTTAG<br>AATAAAATCAGGATGGCGGCGTTAGTATCG | This study    |

| <b>Primers used for plasmid construction</b>    |                                    |                         |               |
|-------------------------------------------------|------------------------------------|-------------------------|---------------|
| <b>Construct Name</b>                           | <b>Orientation (5'-3')</b>         | <b>Restriction Site</b> | <b>Source</b> |
| pRS316-<br>Tim18 Fwd                            | GCGAGCGGCCGCAAAGTTTAGGTCATCACTTCCC | NotI                    | This study    |
| pRS316-<br>Tim18 Rev                            | ACGCGTCGACATAATAAAAAAGGCACTTTAGA   | SalI                    | This study    |
| pRS416 <sub>TEF</sub> <sup>-</sup><br>Tim22 Fwd | GCGGGATCCATGGACTACAAAGACGATGAC     | BamHI                   | This study    |
| pRS416 <sub>TEF</sub> <sup>-</sup><br>Tim22 Rev | ACGCGTCGACTCATTCTTTAAAATCGTTTTG    | SalI                    | This study    |
| pRS416 <sub>TEF</sub> <sup>-</sup><br>Tim18 Fwd | GCGTCTAGAATGCTATTGTTTCCTGGCTTGAAG  | XbaI                    | This study    |
| pRS416 <sub>TEF</sub> <sup>-</sup><br>Tim18 Rev | ACGCGTCGACTTAACGGGTGTTTTGCAACC     | SalI                    | This study    |
| pRS414 <sub>TEF</sub> <sup>-</sup><br>AAC2 Fwd  | CGCGGATCCATGTCTTCCAACGCCCAAG       | BamHI                   | This study    |
| pRS414 <sub>TEF</sub> <sup>-</sup><br>AAC2 Rev  | ACGCGTCGACTTATTTGAACTTCTTACC       | SalI                    | This study    |

|                                                 |                                                                          |       |            |
|-------------------------------------------------|--------------------------------------------------------------------------|-------|------------|
| pRS414 <sub>TEF</sub> <sup>-</sup><br>PIC Fwd   | CTAG <u>ACTAGT</u> ATGTCTGTGTCTGCTGCTCC                                  | SpeI  | This study |
| pRS414 <sub>TEF</sub> <sup>-</sup><br>PIC Rev   | CCG <u>CTCGAG</u> CTAATGACCACCACCACC                                     | XhoI  | This study |
| pRS414 <sub>TEF</sub> <sup>-</sup><br>DIC1 Fwd  | CGCGGATCCATGTCAACCAACGAAAAGAG                                            | BamHI | This study |
| pRS414 <sub>TEF</sub> <sup>-</sup><br>DIC1 Rev  | ACGCGT <u>CGAC</u> CTACTTGTCTTCCTTTGGC                                   | SalI  | This study |
| pRS414 <sub>TEF</sub> <sup>-</sup><br>Tim23 Fwd | CGG <u>ACTAGT</u> ATGTTCGTGGCTTTTTGGAG                                   | SpeI  | This study |
| pRS414 <sub>TEF</sub> <sup>-</sup><br>Tim23 Rev | CCG <u>CTCGAG</u> TCATTTTTCAAGTAGTCTTTTC                                 | XhoI  | This study |
| pRS414 <sub>TEF</sub> <sup>-</sup><br>Tom6 Fwd  | CGCGGATCCATGGACGGTATGTTTG                                                | BamHI | This study |
| pRS414 <sub>TEF</sub> <sup>-</sup><br>Tom6 Rev  | ACGCGT <u>CGAC</u> TTATAATTGTGGGGCC                                      | SalI  | This study |
| pRS414 <sub>TEF</sub> <sup>-</sup><br>Abf2 Fwd  | CGCGGATCCATGAACAGTTACAGCCTATTA                                           | BamHI | This study |
| pRS414 <sub>TEF</sub> <sup>-</sup><br>Abf2 Rev  | CCG <u>CTCGAG</u> CTAGTTGAGAGGGTAGCGAGC                                  | XhoI  | This study |
| pRS416 <sub>GPD</sub><br>SOD1 Fwd               | CGCGGATCCATGGTTCAAGCAGTCGCAGTG                                           | BamHI | This study |
| pRS416 <sub>GPD</sub><br>SOD1 Rev               | TGCGG <u>T</u> CGACTTACTTGTTCGTCATCGTCTTTGTAG<br>TCGTTGGTTAGACCAATGACACC | SalI  | This study |

\* Restriction sites are underlined
